## Retraction

## Retraction of: KCNQ1OT1 promotes melanoma growth and metastasis

Bingyu Guo<sup>1</sup>, Qian Zhang<sup>1</sup>, Hongyi Wang<sup>1</sup>, Peng Chang<sup>1</sup>, Kai Tao<sup>1</sup>

<sup>1</sup>Department of Reconstructive and Plastic Surgery, The General Hospital of Shenyang Military Region, Shenyang, China

**Correspondence to:** Peng Chang, Kai Tao; **email:** [cp17625@163.com](mailto:cp17625@163.com), [luzongzhengxing@sina.com](mailto:luzongzhengxing@sina.com)

**Keywords:** lncRNA, miRNA, KCNQ1OT1, miR-153, melanoma

**Original article:** *Aging (Albany NY)* 2018; 10: pp 632–644

PMID: [29667930](https://pubmed.ncbi.nlm.nih.gov/29667930/)

PMCID: [PMC5940105](https://pubmed.ncbi.nlm.nih.gov/PMC5940105/)

doi: [10.18632/aging.101418](https://doi.org/10.18632/aging.101418)

**This article has been retracted:** Aging has completed its investigation of this paper. We found multiple instances of image overlap, both internal and external. Specifically:

Figure 6: The KCNQ1OT1 migration image in panel E overlaps with the invasion control image in panel H.

Figure 7: The KCNQ1OT1 image in panel B overlaps with the miR-153 AS image in panel F.

Figure 6C control image overlaps with the si-KCNQ1OT1 + miR-153 AS image in Figure 7F.

Figure 6D reuses transwell assay images from Figures 4A and 5C of the authors earlier published paper [1].

Figures 6C and 7F contain transwell assay images that overlap with images from an unrelated 2017 paper from a different institution [2].

The corresponding author informed us that these overlaps were due to improper data storage in the laboratory and has applied for a retraction. Given these findings, the Editorial decision was to retract the paper. All authors have agreed to this retraction.

### REFERENCES

1. Guo B, Zhang Y, Hui Q, Wang H, Tao K. Naringin suppresses the metabolism of A375 cells by inhibiting the phosphorylation of c-Src. *Tumour Biol.* 2016; 37:3841–50.  
<https://doi.org/10.1007/s13277-015-4235-z>  
PMID:[26476533](https://pubmed.ncbi.nlm.nih.gov/26476533/)
2. Zhou H, Huang Z, Chen X, Chen S. miR-98 inhibits expression of TWIST to prevent progression of non-small cell lung cancers. *Biomed Pharmacother.* 2017; 89:1453–61.  
<https://doi.org/10.1016/j.biopha.2017.01.012>  
PMID:[28415380](https://pubmed.ncbi.nlm.nih.gov/28415380/)
